# Supplementary material for: Sleep Alterations in a Mouse Model of Spinocerebellar Ataxia Type 3
Source: MDPI journal article supplement (doi:10.3390/cells11193132), 2022-10-05
Supplement: s1 [file s1]

# Sleep alterations in a mouse model of Spinocerebellar ataxia type 3

Maria-Efstratia Tsimpanouli, Anjesh Ghimire, Anna J. Barget, Ridge Weston, Henry L. Paulson, Maria do Carmo Costa, Brendon O. Watson

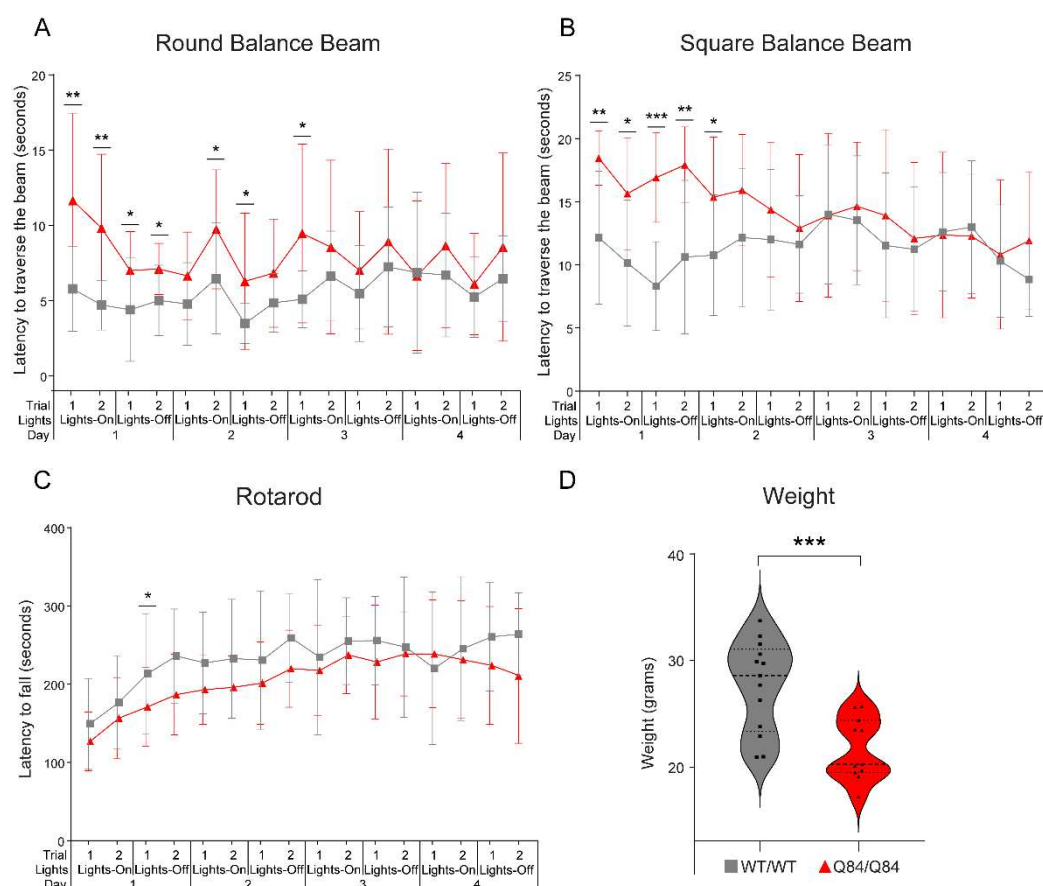

**Figure S1.** Motor impairment and decreased weight in homozygous Q84/Q84 mice. Comparison of phenotypic features in homozygous Q84/Q84 (red triangles, n=11) and wild-type WT/WT (grey squares, n=13) littermates: (A) Motor impairments in the round balance beam on the first three days of assessments; (B) Motor impairments in the square balance beam on the first two days of assessments; (C) Minor motor impairments in the accelerating rotarod on the first day of assessments; (D) Homozygous mice show a decrease in body weight compared with wild-type and hemizygous littermates. All motor tasks statistics are according to post hoc Bonferroni corrected estimated marginal means tests of repeated measures ANOVAs. Weight statistics according to independent t-test. Significance as \*  $p < 0.05$ , \*\*  $p < 0.01$ , \*\*\*  $p < 0.001$ .
